# Supplementary material
Source: PubMed Central journal article supplement (PMC4541095)

## CLINICAL INVESTIGATIONS

# The Efficacy of Screening for Common Dental Diseases by Hygiene-Therapists: A Diagnostic Test Accuracy Study

R. Macey<sup>1</sup>, A. Glenny<sup>1</sup>, T. Walsh<sup>1</sup>, M. Tickle<sup>1</sup>, H. Worthington<sup>1</sup>, J. Ashley<sup>2</sup>, and P. Brocklehurst<sup>1</sup>

Appendix

## Appendix Table.

A 2 × 2 Table of Results for Caries and Periodontal Disease

| H-T   | Caries |       |       | Periodontal Disease |       |     |       |
|-------|--------|-------|-------|---------------------|-------|-----|-------|
|       | GDP    |       | Total | H-T                 | GDP   |     | Total |
|       | Yes    | No    |       |                     | Yes   | No  |       |
| Yes   | 548    | 184   | 732   | Yes                 | 953   | 204 | 1,157 |
| No    | 120    | 1,047 | 1,167 | No                  | 121   | 621 | 742   |
| Total | 668    | 1,231 | 18,99 | Total               | 1,074 | 825 | 1,899 |

GDP, general dental practitioner; H-T, hygiene-therapist.

DOI: 10.1177/0022034514567335. <sup>1</sup>School of Dentistry, University of Manchester, Oxford Road, Manchester, UK, and <sup>2</sup>General Dental Practitioner, Woodlands Dental Practice, Wirral, UK; \*corresponding author, richard.macey@manchester.ac.uk

© International & American Associations for Dental Research

**Appendix Figure.**

Flow chart of recruitment, consenting, randomization, screening, and data recording.

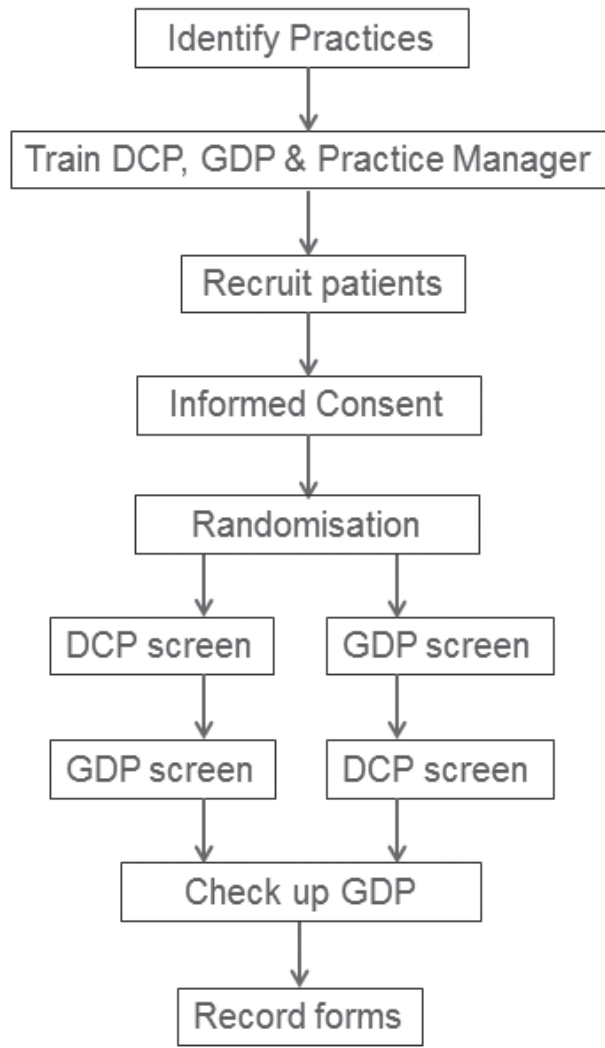

Supplement: DS_10.1177_0022034514567335.pdf [file DS_10.1177_0022034514567335.pdf]
